# Supplementary material
Source: Springer Nature journal article supplement (https://www.springermedizin.de/resource/supplementary/12882_2013_832_MOESM1_ESM.pdf/9454412)
Supplement: MOESM1 [file 9454412]

Global multicentric cohort  
of kidney transplant  
recipients  
**N= 4127**

Exclusion  
Pediatric = 1  
Missing data= 403  
Non Caucasian= 32  
Other nephropathy= 3004  
Missing DNA= 62  
Mixed causes= 362  
**Total= 3864**

Inclusion  
**N= 263 severe IgAN**

IgAN cohort from  
CHU St Etienne,  
France  
**N= 957**

Exclusion:  
eGFR < 60ml/min/1.73m<sup>2</sup>= 78  
Follow up < 10 years= 111  
Non caucasians= 6  
Missing DNA= 116  
Missing data= 72  
Mixed causes= 386  
**Total= 769**

Inclusion  
**N= 188 stable IgAN**
